# Supplementary material for: Unsupervised cell interaction profiling reveals major architectural differences between small intestinal and colonic epithelial crypts
Source: bioRxiv or medRxiv preprint supplement (doi:10.1101/2020.03.06.980243), 2020-03-07
Supplement: Supplementary file [file media-1.pdf]

## Extended data

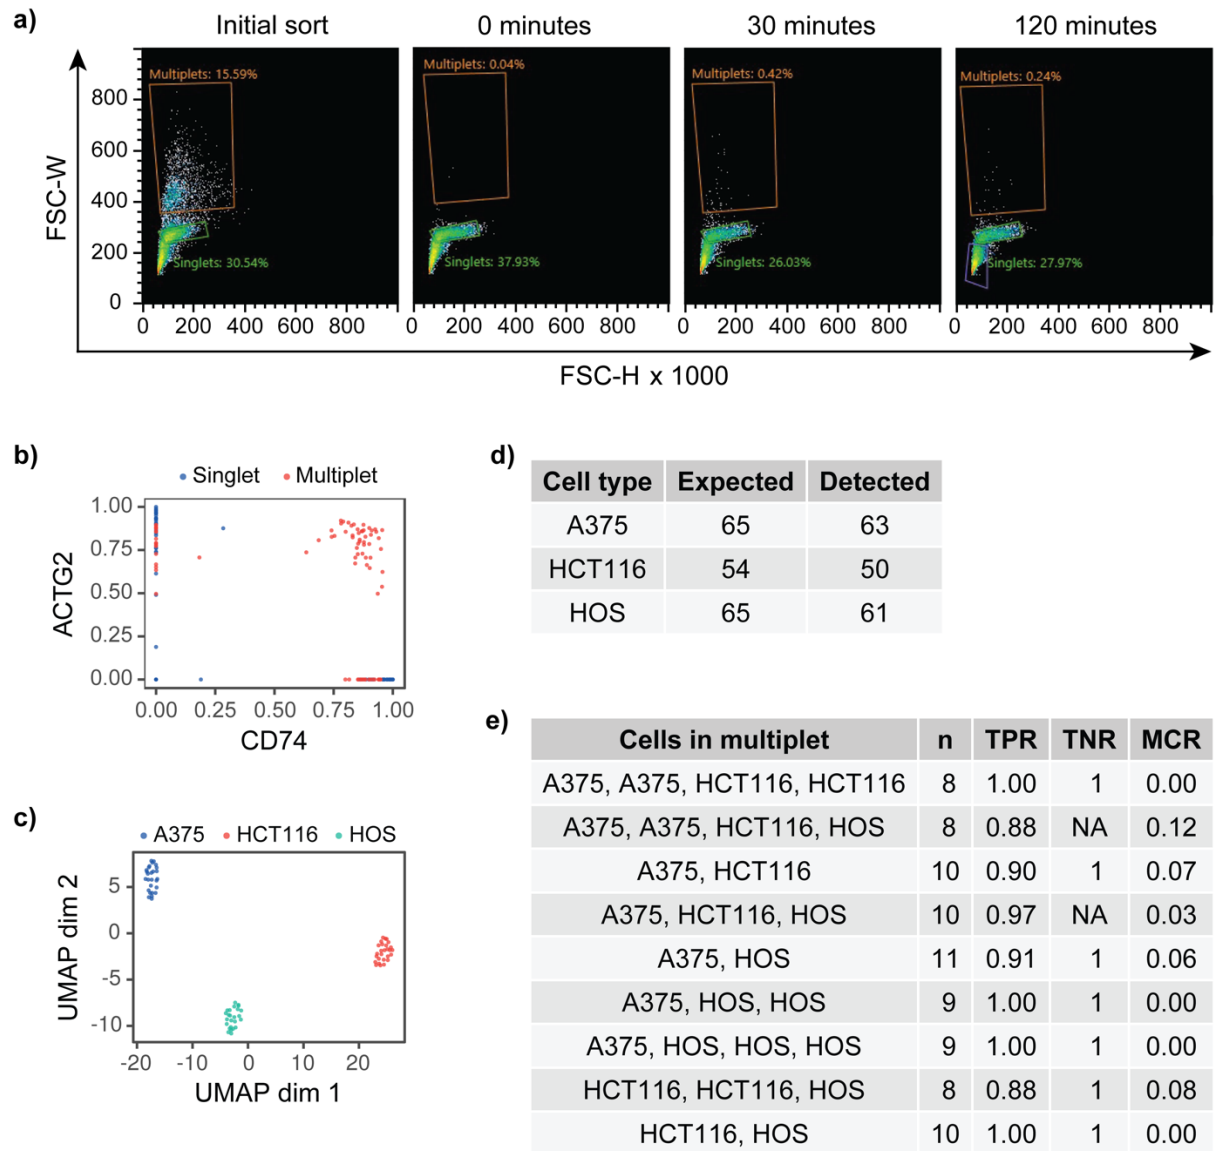

**Extended Data Figure 1.** **a)** Flow cytometry analysis of re-association rate. HCT116 singlets and multiplets were sorted separately and singlets were re-analyzed after 0, 30, and 120 minutes. **b)** Analysis of A375 (CD74) and HOS (ACTG2) specific marker expression in singlets and multiplets shows co-expression is only observed in multiplets. **c)** Dimensionality reduction (UMAP) and unsupervised classification of the sorted cell line singlets. **d)** Numbers of expected (sorted) and detected (deconvoluted) cell types in cell line-based multiplets of a known composition. **e)** Cell line-based multiplets of a known composition results showing the number of samples (n), true positive rate (TPR), true negative rate (TNR), and misclassification rate (MCR) for each multiplet composition.

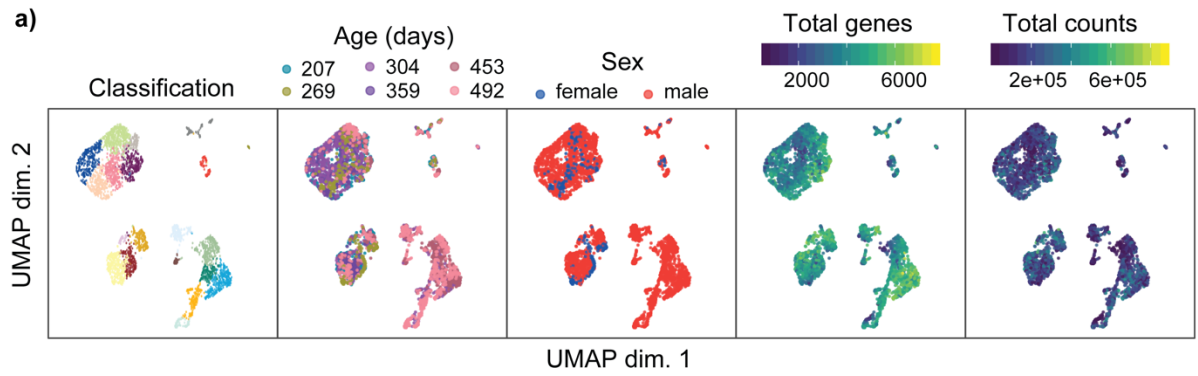

**b)**

| Class     | Small Intestine |        |        |                  |                 |                    | Misc. |       |                 |
|-----------|-----------------|--------|--------|------------------|-----------------|--------------------|-------|-------|-----------------|
|           | Stem            | Goblet | Paneth | Progenitor early | Progenitor late | Transit amplifying | Tuftt | Blood | Enteroendocrine |
| Precision | 0.982           | 1.000  | 1.000  | 1.000            | 1.000           | 1.000              | 0.952 | 1.000 | 1.000           |

  

| Class     | Colon              |        |        |             |                |        |            |                |                   |                      |
|-----------|--------------------|--------|--------|-------------|----------------|--------|------------|----------------|-------------------|----------------------|
|           | Transit amplifying | Stem 2 | Stem 3 | Colonocytes | Goblet Plet1 2 | Stem 1 | Progenitor | Goblet Plet1 1 | Goblet Plet1 neg. | Goblet proliferating |
| Precision | 0.905              | 0.931  | 0.954  | 0.966       | 0.967          | 0.967  | 0.972      | 0.983          | 0.995             | 1.000                |

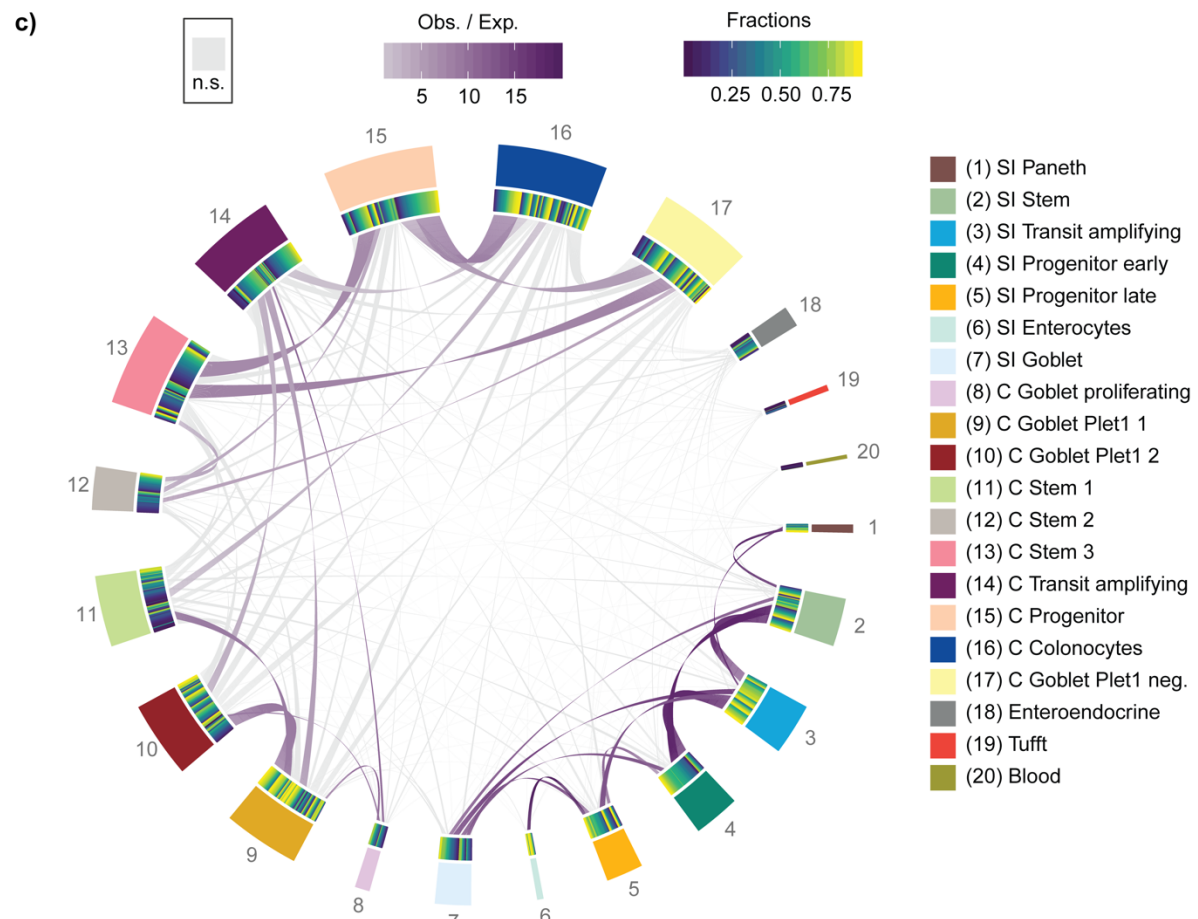

**Extended Data Figure 2.** **a)** Covariate analysis in mouse gut dataset showing a lack of correlation between covariates and classification. **b)** Deconvolution of mouse gut singlets shows a high precision for all classes indicating the validity of the classification and sufficiency of the provided features to allow discrimination between the different cell types. **c)** Deconvolution of the entire mouse gut dataset indicates a lack of enriched cross-tissue connections and thus implies a low false positive connection rate. Note that due to tissue-specific interactions, some previously non-significant connections (eg. goblet cells in small intestine) are now called as significant.

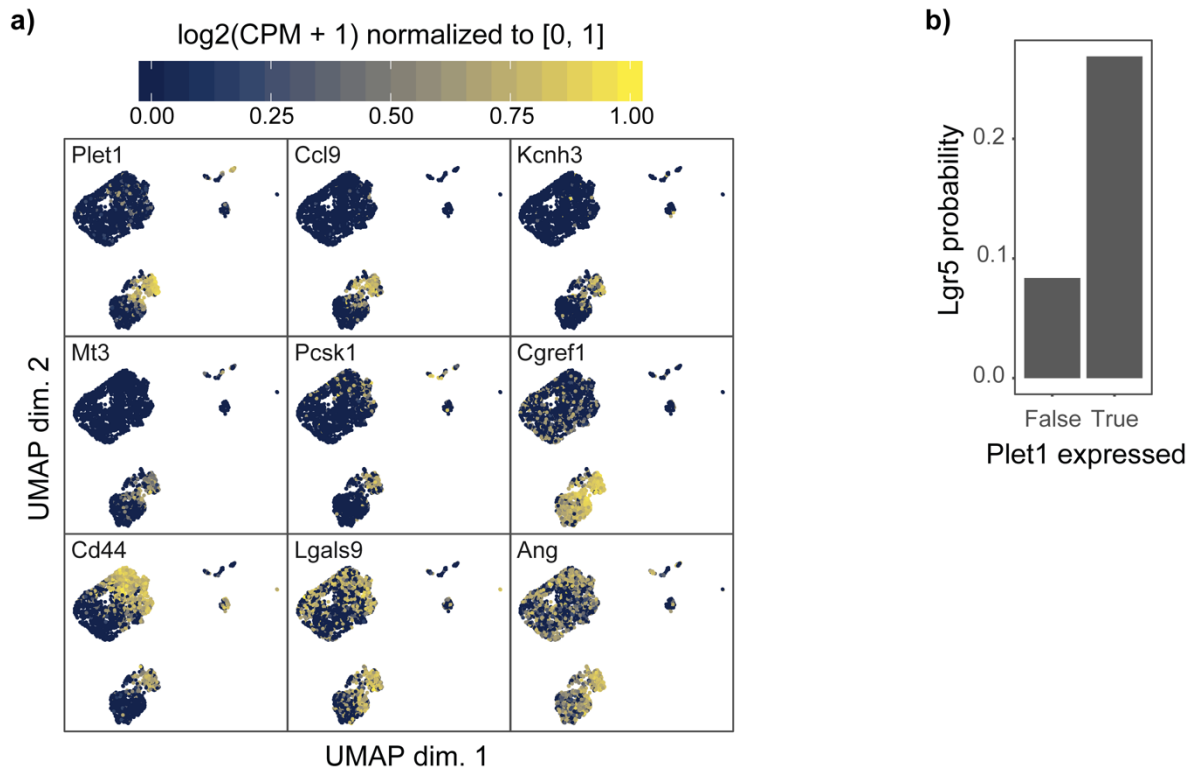

**Extended Data Figure 3.** **a)** *Plet1* differential expression genes, log<sub>2</sub>(TPM + 1) normalized to [0, 1], overlaid on the colonic epithelium UMAP. **b)** The probability of observing *Lgr5* expression in Muc2+ goblet cells dependent on *Plet1* expression.

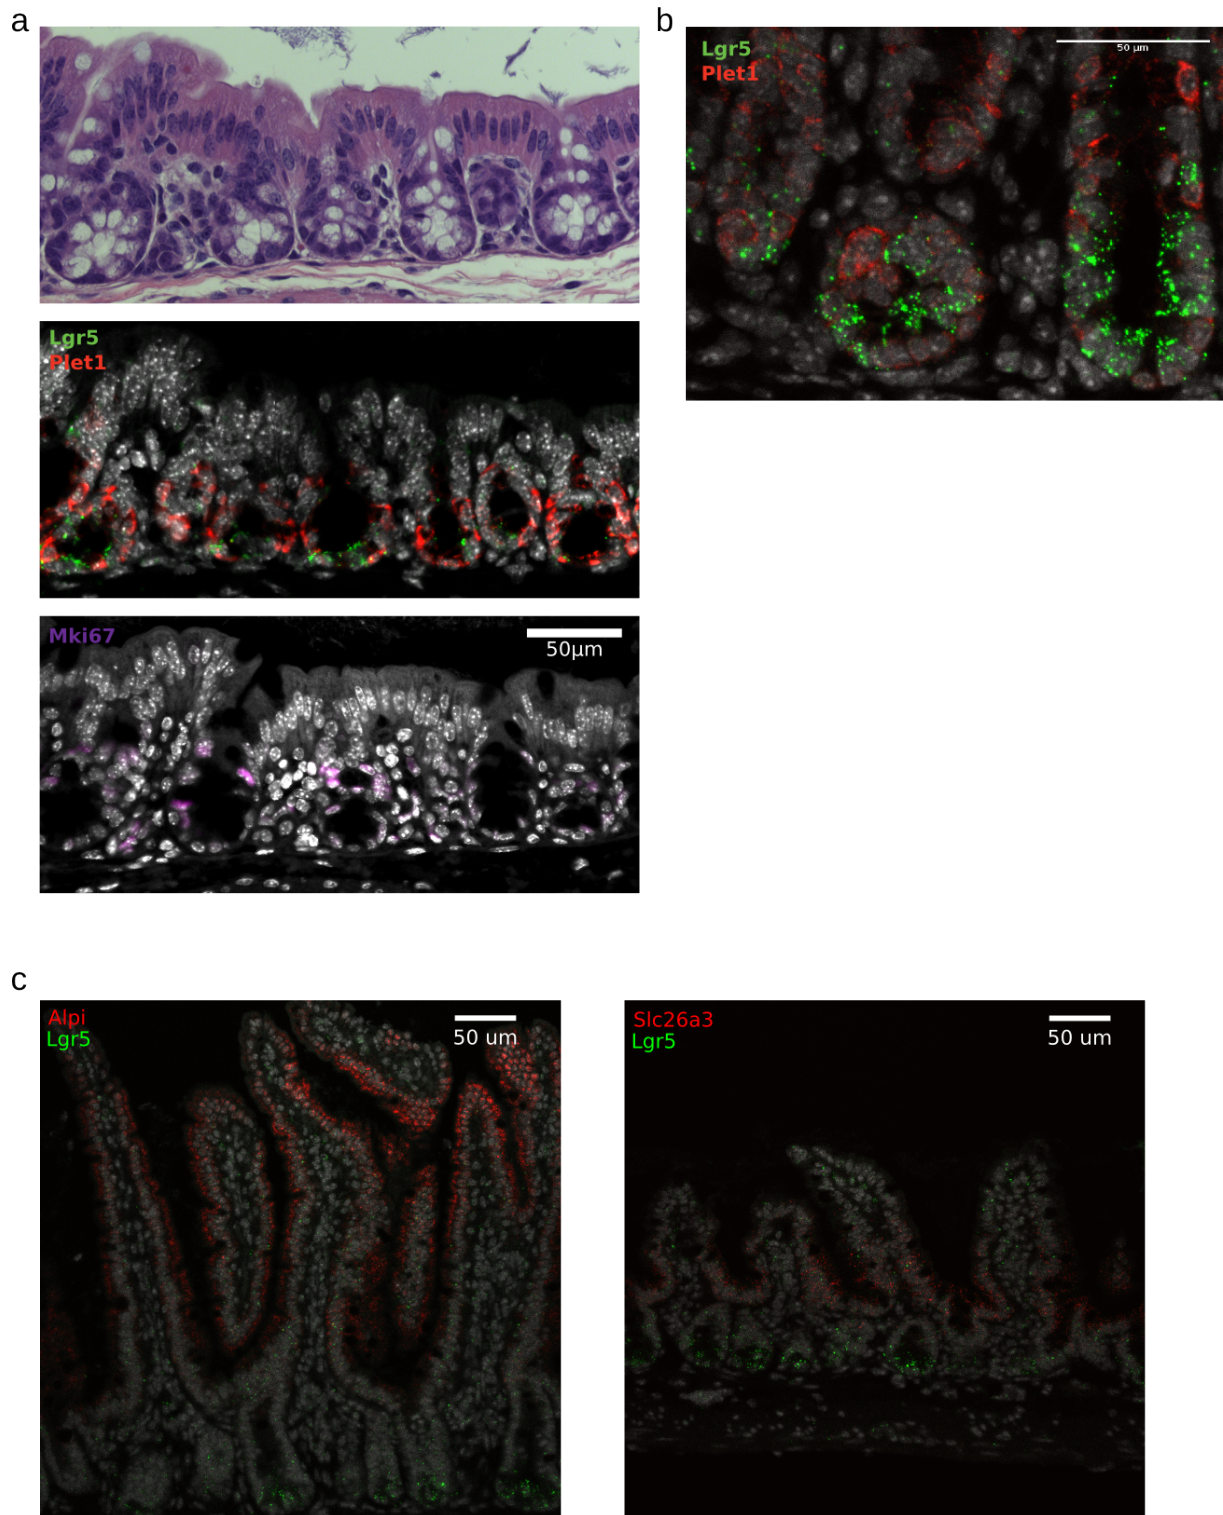

**Extended Data Fig. 4.** **a)** Consecutive slices from histologically unaffected regions of colon from a mouse treated with DSS. H&E (top), RNA ISH of *Lgr5*, *Plet1* (middle), and immunohistochemistry of Mki67 (bottom). **b)** mRNA abundance of *Lgr5* and *Plet1* at the bottom of crypts in regenerating colonic epithelium shows a similar pattern to that seen in normal healthy colon crypts. **c)** RNA ISH of stem cell distant cell types. Left: *Alpi* and *Lgr5* RNA ISH in small intestine. Large *Alpi*<sup>+</sup> structures are villi. Right: *Slc26a3* and *Lgr5* RNA ISH in colon.
